# Supplementary material for: A Novel Method for Tracking Individuals of Fruit Fly Swarms Flying in a Laboratory Flight Arena
Source: PLOS journal article supplement (doi:10.1371/journal.pone.0129657), 2015-06-17
Supplement: S2 (10.1371/journal.pone.0129657.s002) [file journal.pone.0129657.s002]

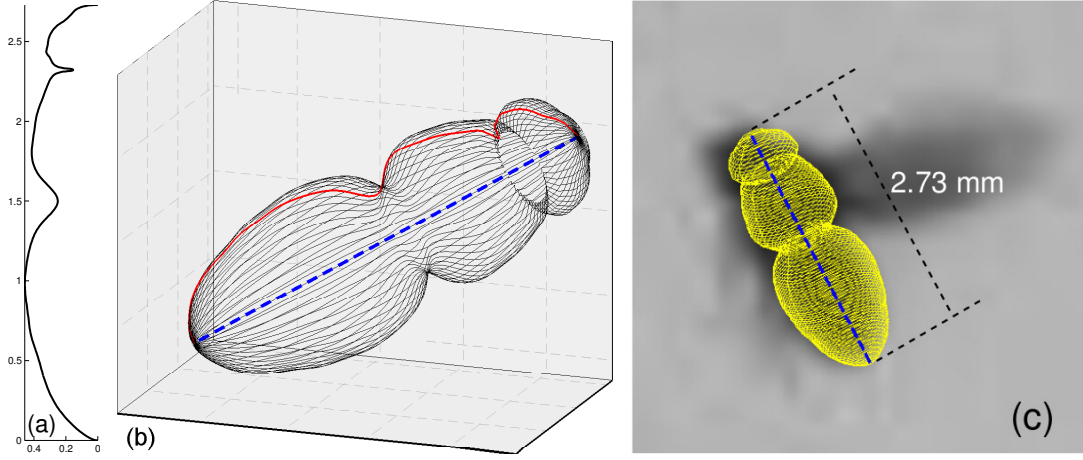

**Figure 1. The generative shape model of *Drosophila*.** (a) The profile curve, denotes by  $\rho$ . (b) The shape  $\Upsilon^3$  is generated by the profile curve  $\rho$  revolving around the *center axis* in 3D space. (c) An image of a fruit fly overlaid by the shape model. The average body length is  $\tilde{l} = 2.73$  mm in our experiments.
